# Supplementary material for: Reduction of graphene oxide – a comprehensive electrochemical investigation in alkaline and acidic electrolytes
Source: Royal Society of Chemistry journal article supplement (doi:10.1039/c4ra10794b), 2014-01-01
Supplement: c4ra10794b1.pdf [file c4ra10794b1.pdf]

## Supporting Information

### **Reduction of graphene oxide – a comprehensive electrochemical investigation in alkaline and acidic electrolytes**

Tathagata Kar, Ruttala Devivaraprasad, Ramesh Kumar Singh, Bapi Bera, Manoj Neergat\*

Department of Energy Science and Engineering, Indian Institute of Technology Bombay (IITB),

Powai, Mumbai–400076, India

\*Corresponding author. Tel.: +91 22 2576 7893; Fax: +91 22 2576 4890

E-mail: [nmanoj@iitb.ac.in](mailto:nmanoj@iitb.ac.in)

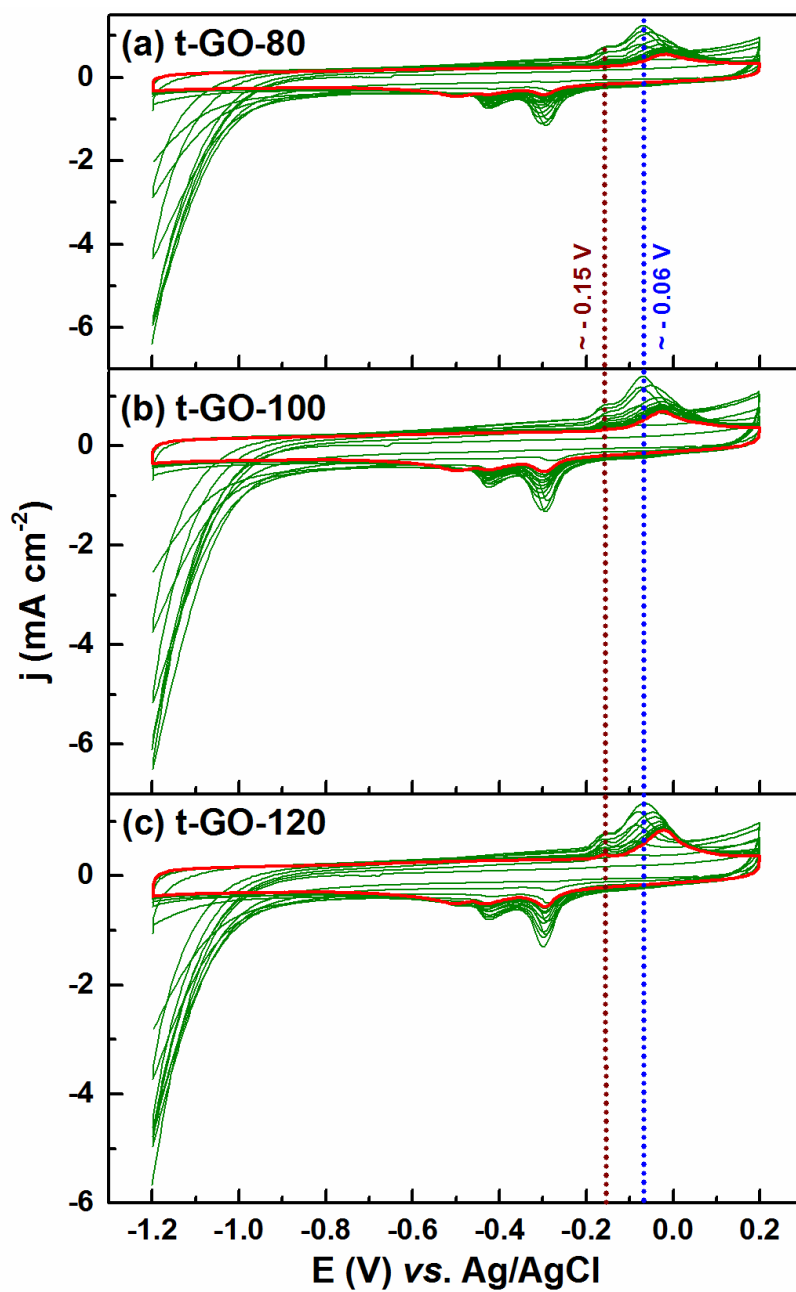

**Fig. S1** CVs of (a) t-GO-80, (b) t-GO-100, and (c) t-GO-120 recorded in argon-saturated 0.1 M KOH electrolyte at a scan rate of 20 mV s<sup>-1</sup>; the initial 5 cycles and thereafter every 5<sup>th</sup> cycle in green lines and the final CV (60<sup>th</sup> cycle) in red line.

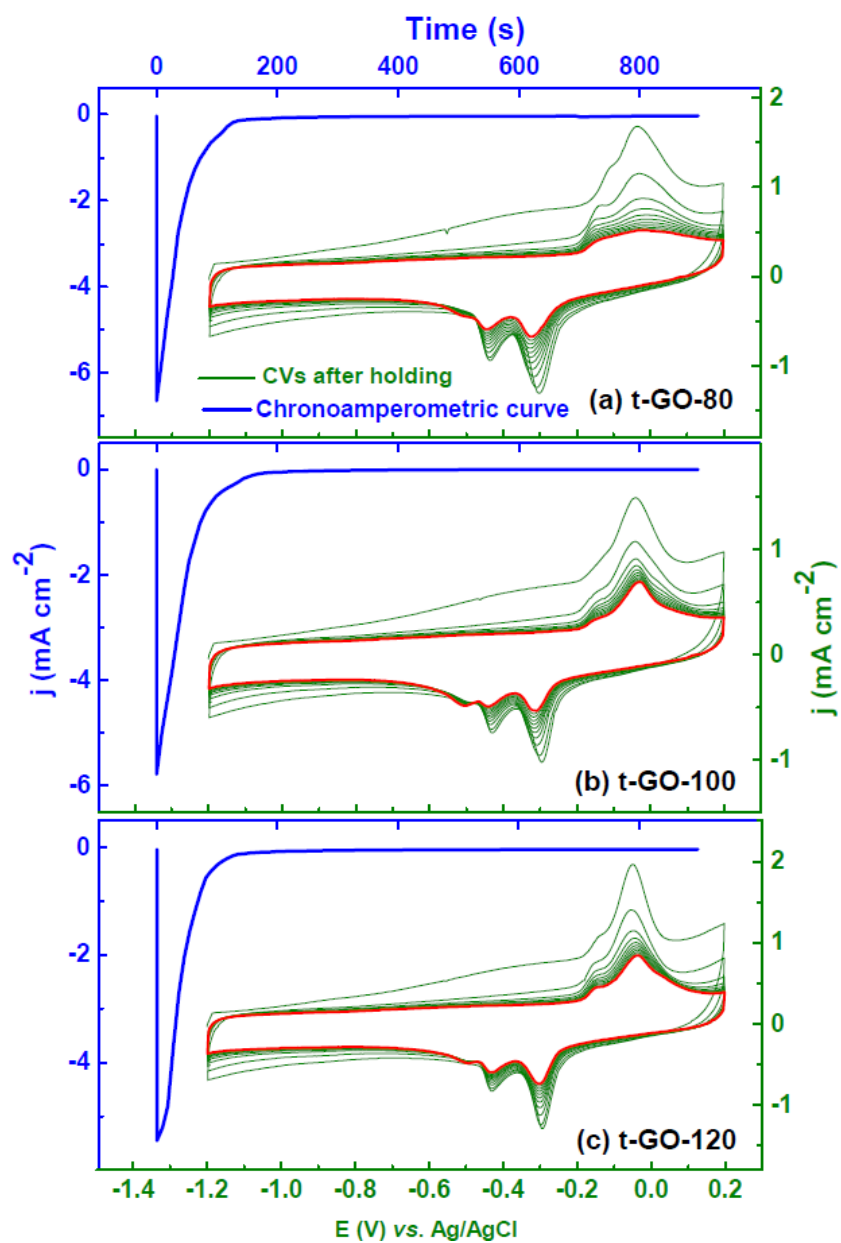

**Fig. S2** Chronoamperometric curve of (a) *t*-GO-80, (b) *t*-GO-100, and (c) *t*-GO-120 recorded at  $-1.2$  V for 15 min. in argon-saturated 0.1 M KOH electrolyte (left and top axes, blue) and the CVs recorded at a scan rate of  $20$  mV s<sup>-1</sup> in the same electrolyte soon after chronoamperometry (bottom and right axes, green); every alternate cycle is shown in green line and the final CV (20<sup>th</sup> cycle) is shown in red line in all the figures.

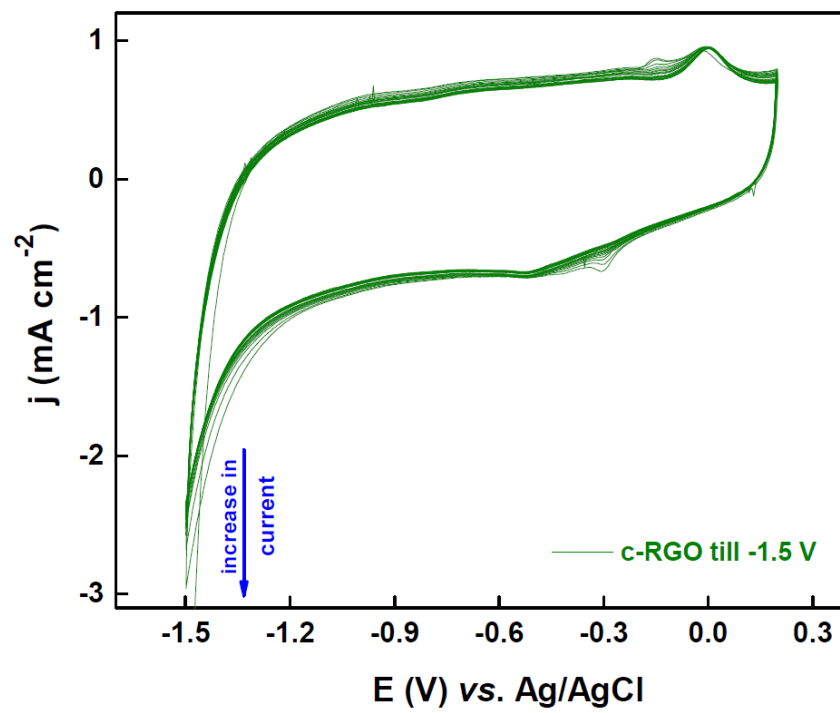

**Fig. S3** CVs (20 cycles) of c-RGO down to  $-1.5$  V in argon-saturated 0.1 M KOH electrolyte at a scan rate of  $20$   $\text{mV s}^{-1}$ .

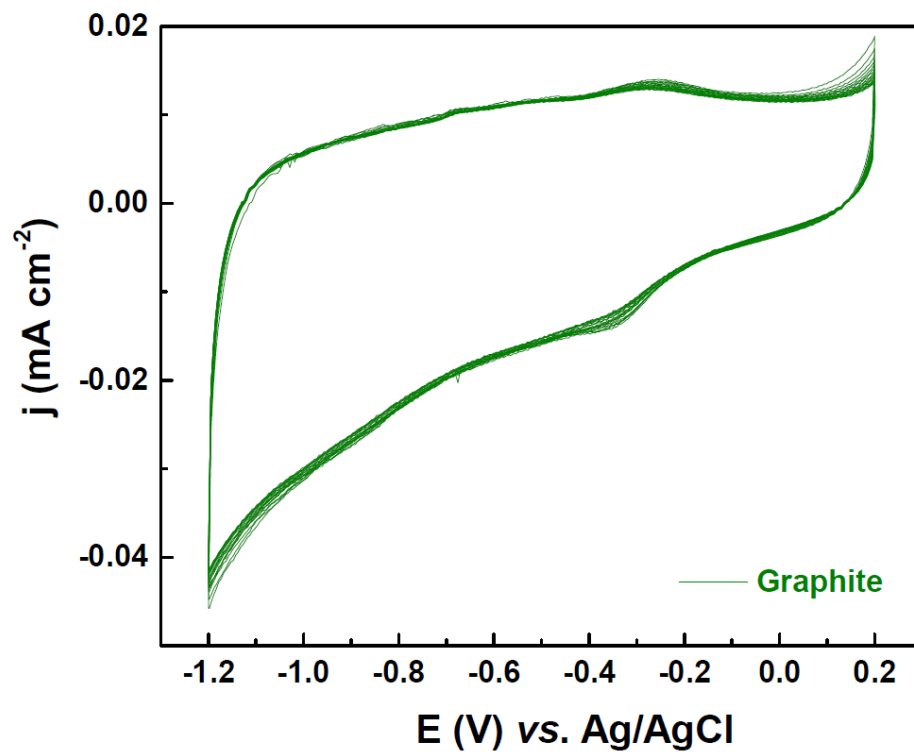

**Fig. S4** CVs of graphite (20 cycles) in argon-saturated 0.1 M KOH electrolyte at a scan rate of  $20 \text{ mV s}^{-1}$ .

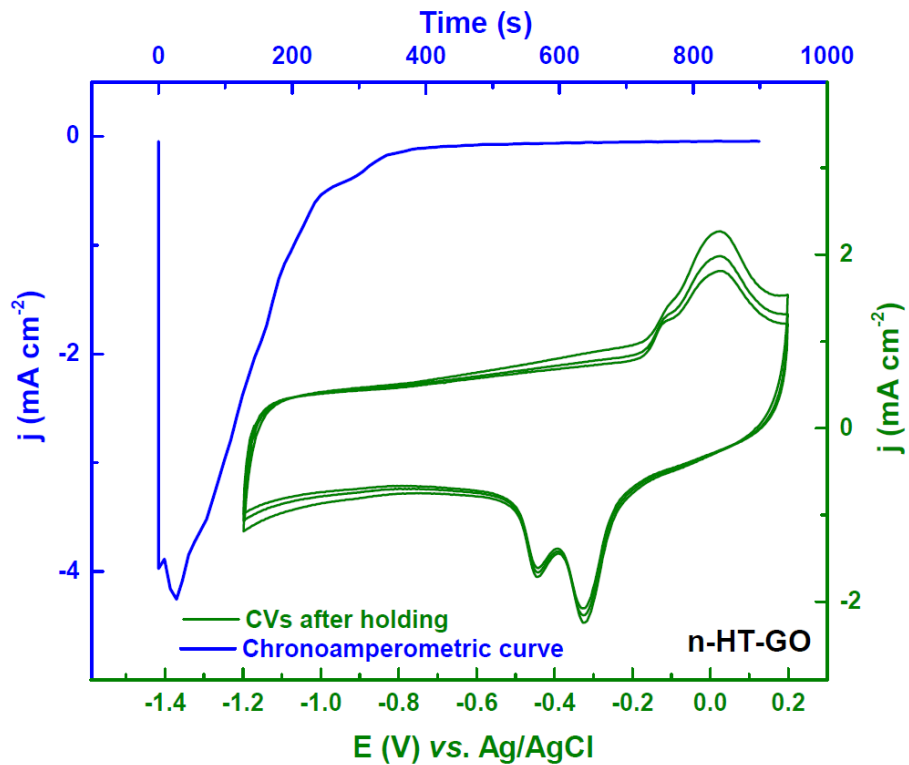

**Fig. S5** Chronoamperometric curve of n-HT-GO recorded at  $-1.2$  V for 15 min. in argon-saturated 0.1 M KOH electrolyte (left and top axes, blue) and the CVs (3 cycles, green lines) recorded at a scan rate of  $20$   $\text{mV s}^{-1}$  in the same electrolyte soon after chronoamperometry (bottom and right axes, green).

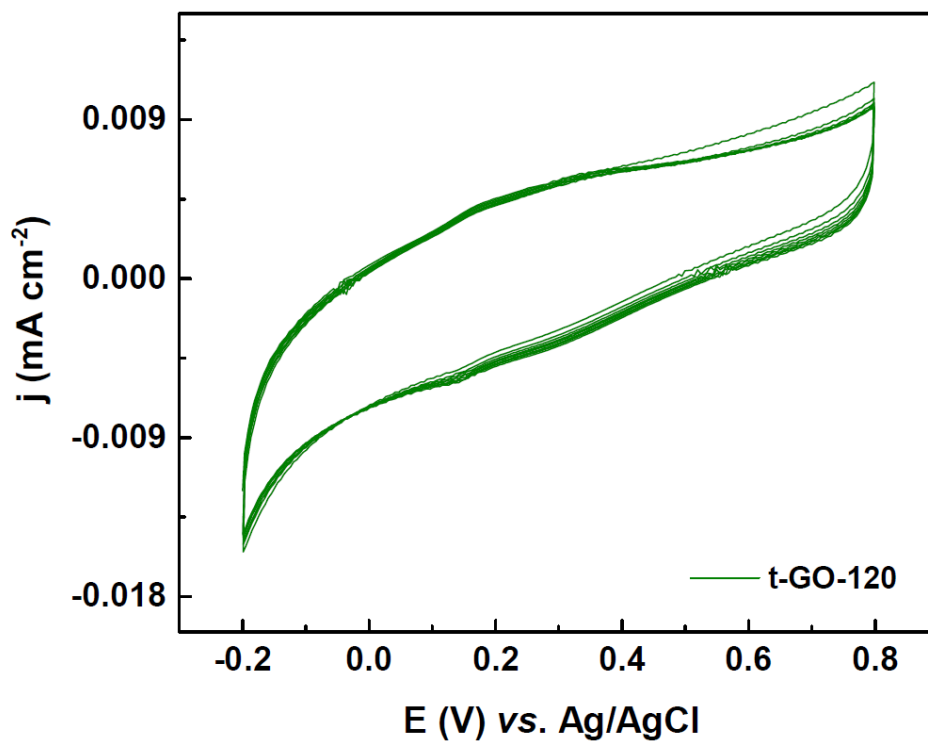

**Fig. S6** CVs (8 cycles) of t-GO-120 recorded in argon-saturated 0.1 M  $\text{HClO}_4$  electrolyte at a scan rate of  $20 \text{ mV s}^{-1}$ .

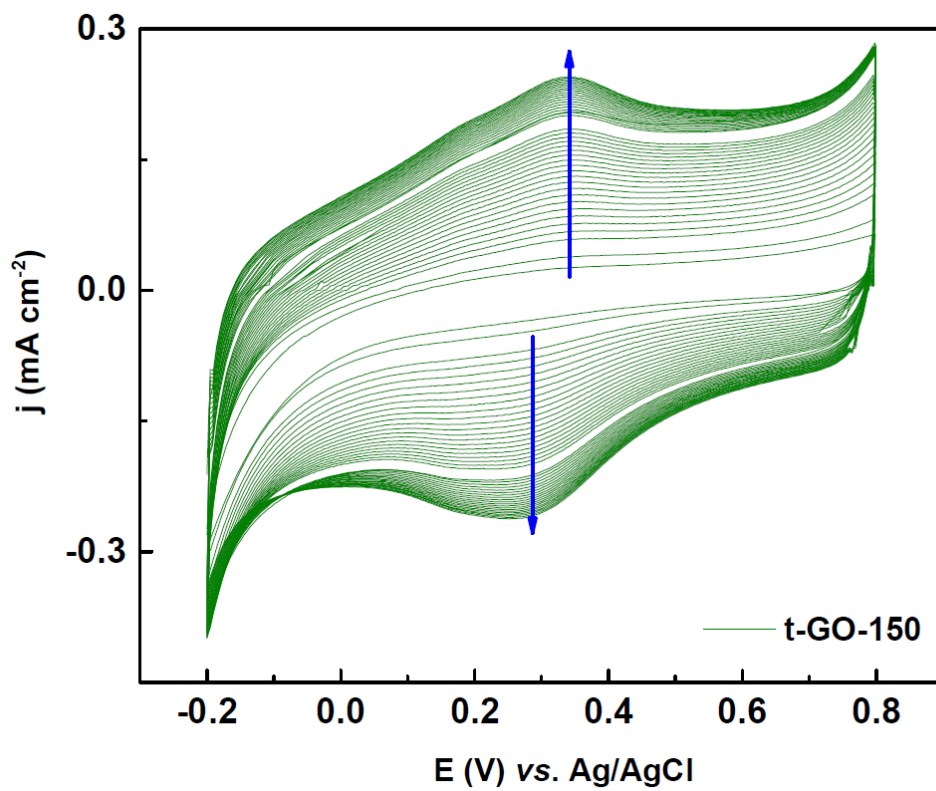

**Fig. S7** CVs (40 cycles) of t-GO-150 recorded in argon-saturated 0.1 M  $\text{HClO}_4$  electrolyte at a scan rate of  $20 \text{ mV s}^{-1}$ .



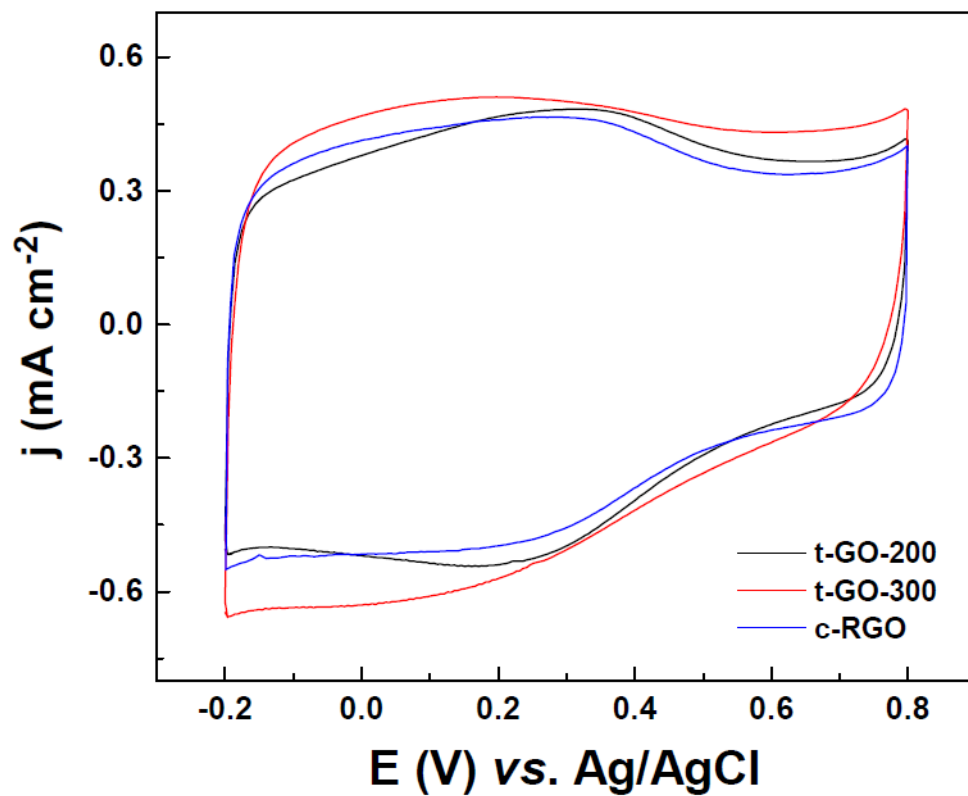

**Fig. S8** CVs of *c*-RGO, *t*-GO-200 and *t*-GO-300 recorded in argon-saturated 0.1 M  $\text{HClO}_4$  electrolyte at a scan rate of  $20 \text{ mV s}^{-1}$ .

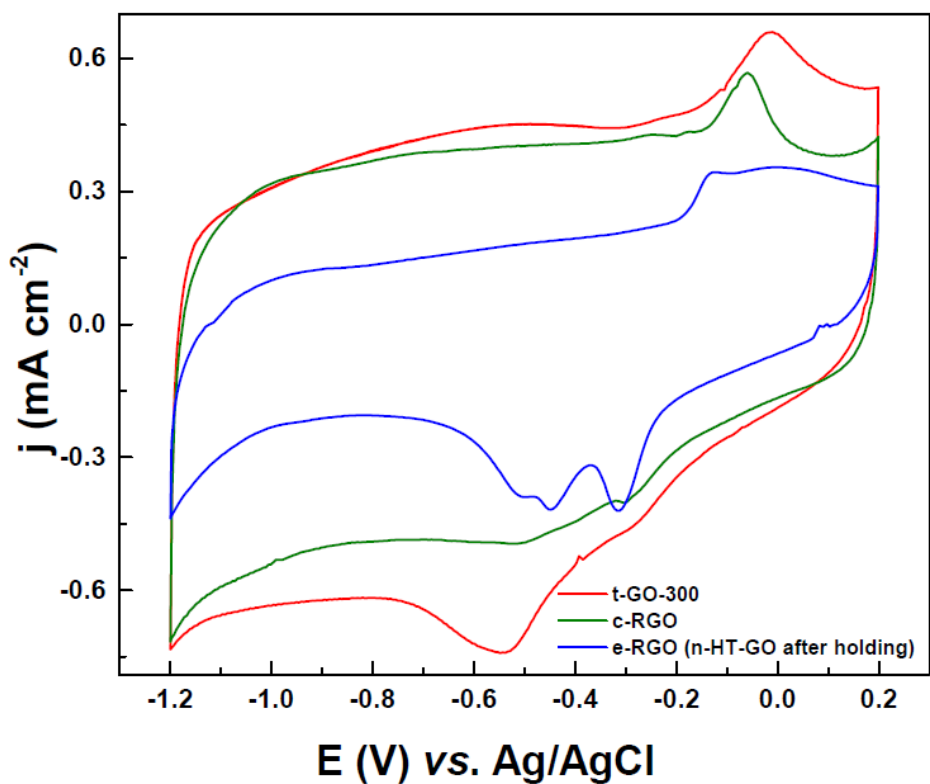

**Fig. S9** CVs of e-RGO (10<sup>th</sup> cycle of n-HT-GO after holding), c-RGO and t-GO-300 recorded in argon-saturated 0.1 M KOH electrolyte at a scan rate of 20 mV s<sup>-1</sup>.

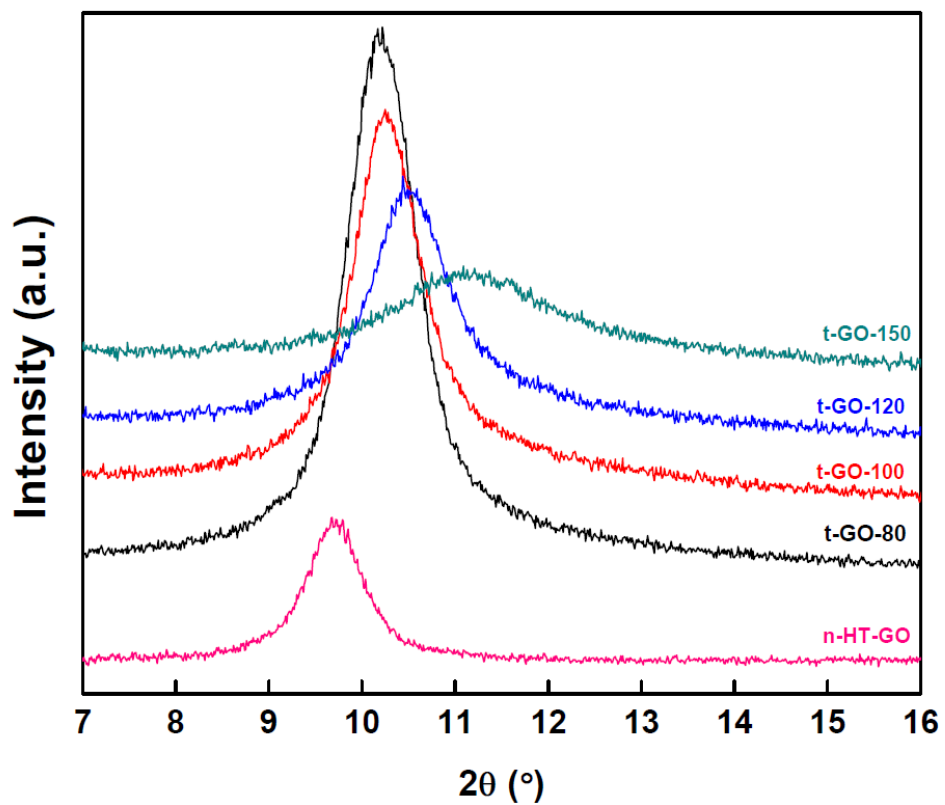

*Fig. S10 XRD patterns of the n-HT-GO, t-GO-80, t-GO-100, t-GO-120, and t-GO-150 (magnified view of the encircled region shown in Fig. 12).*

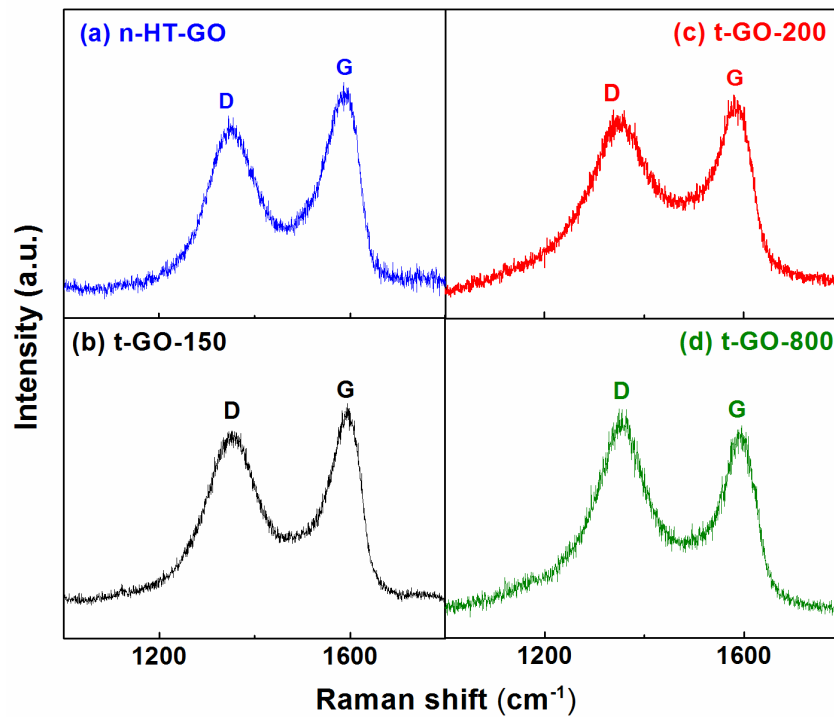

**Fig. S11** Raman spectra of (a) n-HT-GO (b) t-GO-150 (c) t-GO-200 and (d) t-GO-800.

**Table S1.** Specific capacitance of c-RGO and t-GOs

| Samples  | Alkaline medium (F g <sup>-1</sup> ) | Acidic medium (F g <sup>-1</sup> ) |
|----------|--------------------------------------|------------------------------------|
| t-GO-200 | 173                                  | 168                                |
| t-GO-300 | 177                                  | 172                                |
| t-GO-400 | 45                                   | 40                                 |
| t-GO-500 | 20                                   | 18                                 |
| t-GO-800 | 13                                   | 10                                 |
| c-RGO    | 162                                  | 158                                |
